# Supplementary material
Source: PubMed Central journal article supplement (PMC8628271)
Supplement: NIHMS1756640-supplement-Supplement.pdf [file NIHMS1756640-supplement-Supplement.pdf]

# Supplementary Material

## Lack of Association Between *GBA* Mutations and Motor Complications in European and American Parkinson's Disease Cohorts

**Supplementary Table 1.** Primers used to amplify *GBA* for sequencing

| <b>Primer application<sup>a</sup></b> | <b>Primer 1 (5' to 3')</b> | <b>Primer 2 (5' to 3')</b> |
|---------------------------------------|----------------------------|----------------------------|
| Exons 5-7                             | CAGGAGCCCAAGTTCCC          | AGTTTGGGAGCCAGTCATT        |
| Exons 8-11                            | TGTGTGCAAGGTCCAGGATCAG     | ACCACCTAGAGGGGAAAGTG       |
| Exons 9-11                            | GGAGGACCCAATTGGGTGCGT      | ACCACCTAGAGGGGAAAGTG       |

<sup>a</sup> The fragment spanning exons 5-7 was used for sequencing of Y135C, the fragment spanning exons 8-11 was used for sequencing of E326K, T369M, and N370S, and the fragment spanning exons 9 – 11 was used in restriction fragment length polymorphism (PCR-RFLP) assays for the detection and sequencing confirmation of L444P.

**Supplementary Table 2.** Frequencies of *GBA* variants in each of the cohorts

| <b><i>GBA</i> mutation carriers<sup>a</sup></b>  | <b>ParkWest</b> | <b>PINE</b> | <b>NYPUM</b> | <b>PEG</b> |
|--------------------------------------------------|-----------------|-------------|--------------|------------|
| N (TOTAL)                                        | 189             | 117         | 133          | 445        |
| <i>Severe mutations</i>                          |                 |             |              |            |
| G202R                                            | -               | -           | -            | 1 (0.2)    |
| R257Q                                            | -               | -           | -            | 1 (0.2)    |
| D409H                                            | -               | -           | -            | 1 (0.2)    |
| L444P                                            | 1 (0.5)         | 1 (0.9)     | 4 (3.0)      | 2 (0.4)    |
| <i>Mild mutations</i>                            |                 |             |              |            |
| N370S                                            | 1 (0.5)         | 0           | 0            | 3 (0.7)    |
| <i>Risk mutations</i>                            |                 |             |              |            |
| E326K                                            | 14 (7.4)        | 4 (3.4)     | 11 (8.3)     | 20 (4.4)   |
| T369M                                            | 5 (2.6)         | 6 (5.1)     | 5 (3.8)      | 7 (1.6)    |
| <i>Variants of unknown significance</i>          |                 |             |              |            |
| K-27R                                            | -               | -           | -            | 1 (0.2)    |
| R39C                                             | -               | -           | -            | 1 (0.2)    |
| R47Q                                             | -               | -           | -            | 1 (0.2)    |
| I119T                                            | -               | -           | -            | 1 (0.2)    |
| Y135C                                            | 1 (0.5)         | 0           | 0            | -          |
| V460L                                            | 1 (0.5)         | 0           | 0            | -          |
| <b><i>GBA</i> variant categories<sup>b</sup></b> |                 |             |              |            |
| non-carriers                                     | 167 (88.4)      | 106 (90.6)  | 113 (85.0)   | 409 (91.9) |
| <i>GBA</i> carriers                              | 22 (11.6)       | 11 (9.4)    | 20 (15.0)    | 36 (8.1)   |
| Severe mutation carriers                         | 1 (0.5)         | 1 (0.9)     | 4 (3.0)      | 5 (1.1)    |
| Mild mutation and risk factor carriers           | 19 (10.1)       | 10 (8.5)    | 16 (12.0)    | 29 (6.5)   |

<sup>a</sup> All amino acid substitutions are numbered excluding the 39-residue signal peptide.

<sup>b</sup> “*GBA* carriers” included all patients carrying any of the detected nonsynonymous *GBA* variants. The *GBA* variants were further categorised as severe, mild or risk mutations or variants of unknown significance.

Two patients carried both E326K and T369M, one both K-27R and D409H, and one both I119T and E326K.

-, PINE and NYPUM were only genotyped for the variants detected by whole exome sequencing in the ParkWest patients.

NC, normal control; NYPUM, the New Parkinson Patient in Umeå project; PD, Parkinson Disease; ParkWest, the Norwegian ParkWest study; PINE, the Parkinsonism Incidence in Northeast Scotland study; PEG, Parkinson’s Environment Gene.

**Supplementary Table 3.** Characteristics of *GBA* variants identified in this study

| Position <sup>a</sup> | ID SNP      | Allele | Amino acid change <sup>b</sup> | Cohorts <sup>c</sup> | ClinVar <sup>d</sup>         | Gaucher disease <sup>e</sup> | Parkinson's disease <sup>f</sup> | Classification <sup>g</sup> |
|-----------------------|-------------|--------|--------------------------------|----------------------|------------------------------|------------------------------|----------------------------------|-----------------------------|
| 155240707             | rs150466109 | T>C    | K13R / K-27R                   | USA                  | Benign                       | Uncertain [1]                | Uncertain [2]                    | VUS                         |
| 155239961             | rs146774384 | G>A    | R78C/ R39C                     | USA                  | Not found                    | -                            | Uncertain [3]                    | VUS                         |
| 155239936             | rs144173415 | C>T    | R86Q / R47Q                    | USA                  | Not found                    | -                            | -                                | VUS                         |
| 155238632             | rs77834747  | A>G    | I158T / I119T                  | USA                  | Uncertain                    | Uncertain [4]                | -                                | VUS                         |
| 155238584             | rs781152868 | T>C    | Y174C / Y135C                  | EUR                  | Uncertain                    | -                            | -                                | VUS                         |
| 155238174             | rs409652    | C>T    | G241R / G202R                  | USA                  | Pathogenic                   | Severe [5-7]                 |                                  | Severe                      |
| 155237453             | rs78973108  | C>T    | R296Q / R257Q                  | USA                  | Pathogenic                   | Severe [5,6,8]               |                                  | Severe                      |
| 155236376             | rs2230288   | C>T    | E365K / E326K                  | EUR/USA              | Benign                       | Benign [9]                   | Risk [10]                        | Risk                        |
| 155236246             | rs75548401  | G>A    | T408M / T369M                  | EUR/USA              | Benign                       | Benign [9]                   | Risk [11]                        | Risk                        |
| 155235843             | rs76763715  | T>C    | N409S / N370S                  | EUR/USA              | Pathogenic/Likely pathogenic | Mild [5,12]                  |                                  | Mild                        |
| 155235727             | rs1064651   | C>G    | D448H / D409H                  | USA                  | Pathogenic/Likely pathogenic | Severe [5,13]                |                                  | Severe                      |
| 155235252             | rs421016    | A>C    | L483P / L444P                  | EUR/USA              | Pathogenic/Likely pathogenic | Severe [5,14]                |                                  | Severe                      |
| 155235205             | rs369068553 | C>G    | V499L / V460L                  | EUR                  | Likely pathogenic            | -                            | Uncertain [15]                   | VUS                         |

<sup>a</sup> Position on chromosome one based on GRCh38.p12

<sup>b</sup> Amino acid change in the full length glucocerebrosidase protein or / the processed form excluding the 39-residue signal peptide.

<sup>c</sup> Cohorts categorized as EUR (European cohorts: ParkWest, PINE or NYPUM) or USA (PEG)

<sup>d</sup> ClinVar classification ([ncbi.nlm.nih.gov/clinvar/](http://ncbi.nlm.nih.gov/clinvar/))<sup>f</sup>

<sup>e</sup> Classification based on severity of Gaucher disease. Classification based on Beutler et al 2005 [30] and supplemented by more recent data from The Human Gene Mutation Database (<http://www.hgmd.cf.ac.uk/>) [31], ClinVar (<https://www.ncbi.nlm.nih.gov/clinvar/>) and literature identified in Pubmed (<https://pubmed.ncbi.nlm.nih.gov>). Updates from Beutler et al 2005 are marked in italic font. -, not reported; uncertain, reported but insufficient evidence to assign pathogenicity.

<sup>f</sup> Each variant not classified in GD was subsequently assessed for association with PD using literature identified in Pubmed. uncertain, reported but insufficient evidence to assign as risk variant.

<sup>g</sup> Categorization of *GBA* variant as severe or benign. See materials and methods for full details.  
EUR, Europe; VUS, variants of unknown significance

## REFERENCES

- [1] Rozenberg R, Fox DC, Sobreira E, Pereira LV (2006) Detection of 12 new mutations in Gaucher disease Brazilian patients. *Blood Cells Mol Dis* **37**, 204-209.
- [2] Nishioka K, Vilarino-Guell C, Cobb SA, Kachergus JM, Ross OA, Wider C, Gibson RA, Hentati F, Farrer MJ (2010) Glucocerebrosidase mutations are not a common risk factor for Parkinson disease in North Africa. *Neurosci Lett* **477**, 57-60.
- [3] Graham OEE, Pitcher TL, Liao Y, Miller AL, Dalrymple-Alford JC, Anderson TJ, Kennedy MA (2020) Nanopore sequencing of the glucocerebrosidase (GBA) gene in a New Zealand Parkinson's disease cohort. *Parkinsonism Relat Disord* **70**, 36-41.
- [4] Germain DP, Puech JP, Caillaud C, Kahn A, Poenaru L (1998) Exhaustive screening of the acid beta-glucosidase gene, by fluorescence-assisted mismatch analysis using universal primers: mutation profile and genotype/phenotype correlations in Gaucher disease. *Am J Hum Genet* **63**, 415-427.
- [5] Beutler E, Gelbart T, Scott CR (2005) Hematologically important mutations: Gaucher disease. *Blood Cells Mol Dis* **35**, 355-364.
- [6] Beutler E, Demina A, Gelbart T (1994) Glucocerebrosidase mutations in Gaucher disease. *Mol Med* **1**, 82-92.
- [7] Filocamo M, Mazzotti R, Stroppiano M, Seri M, Giona F, Parenti G, Regis S, Corsolini F, Zoboli S, Gatti R (2002) Analysis of the glucocerebrosidase gene and mutation profile in 144 Italian gaucher patients. *Hum Mutat* **20**, 234-235.
- [8] Stone DL, Tayebi N, Orvisky E, Stubblefield B, Madike V, Sidransky E (2000) Glucocerebrosidase gene mutations in patients with type 2 Gaucher disease. *Hum Mutat* **15**, 181-188.
- [9] Hruska KS, LaMarca ME, Scott CR, Sidransky E (2008) Gaucher disease: mutation and polymorphism spectrum in the glucocerebrosidase gene (GBA). *Hum Mutat* **29**, 567-583.
- [10] Pankratz N, Beecham GW, DeStefano AL, Dawson TM, Doheny KF, Factor SA, Hamza TH, Hung AY, Hyman BT, Ivinson AJ, Krainc D, Latourelle JC, Clark LN, Marder K, Martin ER, Mayeux R, Ross OA, Scherzer CR, Simon DK, Tanner C, Vance JM, Wszolek ZK, Zabetian CP, Myers RH, Payami H, Scott WK, Foroud T, PD GWAS Consortium (2012) Meta-analysis of Parkinson's disease: identification of a novel locus, RIT2. *Ann Neurol* **71**, 370-384.

- [11] Mallett V, Ross JP, Alcalay RN, Ambalavanan A, Sidransky E, Dion PA, Rouleau GA, Gan-Or Z (2016) GBA p.T369M substitution in Parkinson disease: Polymorphism or association? A meta-analysis. *Neurol Genet* **2**, e104.
- [12] Tsuji S, Martin BM, Barranger JA, Stubblefield BK, LaMarca ME, Ginns EI (1988) Genetic heterogeneity in type 1 Gaucher disease: multiple genotypes in Ashkenazic and non-Ashkenazic individuals. *Proc Natl Acad Sci U S A* **85**, 2349-2352.
- [13] Filocamo M, Grossi S, Stroppiano M, Tortori-Donati P, Regis S, Allegri A, Di Rocco M (2005) Homozygosity for a non-pseudogene complex glucocerebrosidase allele as cause of an atypical neuronopathic form of Gaucher disease. *Am J Med Genet A* **134A**, 95-96.
- [14] Tsuji S, Choudary PV, Martin BM, Stubblefield BK, Mayor JA, Barranger JA, Ginns EI (1987) A mutation in the human glucocerebrosidase gene in neuronopathic Gaucher's disease. *N Engl J Med* **316**, 570-575.
- [15] McNeill A, Duran R, Hughes DA, Mehta A, Schapira AH (2012) A clinical and family history study of Parkinson's disease in heterozygous glucocerebrosidase mutation carriers. *J Neurol Neurosurg Psychiatry* **83**, 853-854.

**Supplementary Table 4.** Summary of the cohorts included in this study

|                                         | European cohorts |             |             |             | American cohorts |             |             |
|-----------------------------------------|------------------|-------------|-------------|-------------|------------------|-------------|-------------|
|                                         | ParkWest         | PINE        | NYPUM       | Combined    | PEG1             | PEG2        | Combined    |
| N total                                 | 189              | 117         | 133         | 439         | 219              | 226         | 445         |
| Male, N (%)                             | 115 (60.8)       | 72 (61.5)   | 80 (60.2)   | 267 (60.8)  | 124 (57.7)       | 149 (65.9)  | 273 (61.3)  |
| Age at diagnosis, y                     | 68.5 (12.4)      | 73.3 (12.7) | 71.4 (14.4) | 70.7 (14.0) | 69.0 (14.0)      | 70.0 (13.0) | 70.0 (13.0) |
| Family history, N (%)                   | 16 (13.7)        | 16 (13.7)   | 21 (11.1)   | 56 (12.8)   | 24 (11.2)        | 35 (15.5)   | 59 (13.3)   |
| Education, y                            | 11.0 (5.0)       | 11.0 (5.0)  | 8.0 (5.0)   | 11.0 (5.0)  | 13.0 (4.0)       | 14.0 (5.0)  | 14.0 (4.0)  |
| UPDRS III                               | 21.0 (16.5)      | 23.0 (15.0) | 26.0 (15.0) | 23.0 (16.0) | 18.0 (13.0)      | 17.0 (16.0) | 18.0 (14.0) |
| Hoehn & Yahr                            | 2.0 (1.0)        | 2.5 (1.0)   | 2.0 (0.5)   | 2.0 (1.0)   | 2.0 (1.0)        | 2.0 (0.5)   | 2.0 (0.5)   |
| Duration of PD at baseline, y           | 0.01 (0.1)       | 0.01 (0.1)  | 0.1 (0.1)   | 0.1 (0.1)   | 0.7 (1.8)        | 2.6 (1.7)   | 1.7 (2.4)   |
| Duration of follow up from diagnosis, y | 9.1 (2.3)        | 8.0 (5.1)   | 8.0 (4.9)   | 9.0 (4.1)   | 5.6 (2.7)        | 4.7 (2.2)   | 5.1 (2.5)   |
| Number of deaths, n (%)                 | 66 (34.9)        | 69 (59.0)   | 59 (44.4)   | 194 (44.2)  | 100 (46.5)       | 22 (9.7)    | 122 (27.7)  |
| Time to death, y, mean (SD)             | 8.2 (3.3)        | 6.9 (3.3)   | 6.7 (2.7)   | 7.4 (3.3)   | 7.6 (2.6)        | 5.6 (1.8)   | 7.2 (2.6)   |

Values presented as median (IQR) unless stated otherwise.

PD, Parkinson's disease, SD, standard deviation, UPDRS III, Unified Parkinson Disease Rating Scale Part III.
